# Supplementary material for: Three-Phase ScAlN-based PMUT driven Acoustic Steaming Micropump
Source: Research Square preprint supplement (doi:10.21203/rs.3.rs-7170127/v1), 2025-09-15
Supplement: Supplementary file 1 [file e0a54364822725ebf1ec3349.docx]

**Three-Phase ScAlN-based PMUT driven Acoustic Steaming Micropump**

*Microsystems & Nanoengineering*

Chen Wu1,2, Grim Keulemans2, Benjamin Jones2, Veronique Rochus2, Xavier Rottenberg2

and Paul Heremans1,2

1Department of Electrical Engineering, KU Leuven, B-3001 Leuven, Belgium and

2imec, Kapeldreef 75, B-3001 Leuven, Belgium

Supplementary materials: LDV measurement, PMUT membrane displacement comparison between LDV measurements and simulations, acoustic streaming theories, and FEM simulations.

1. **LDV measurement**

The LDV measurements result is shown in Fig. 1, and the displacement comparison between measurements and simulations under same applied AC voltage amplitude of 20 V is shown in Fig. 2. The simulated membrane displacement is produced using the single cell PMUT model by introducing a 120º phase difference between adjacent PMUT cells. Due to the simplifying assumptions in the simulations, no discernable deviation in the phase between applied electrical signal and membrane displacement is observed in numerical results.

|  |
| --- |
| **Figure 1.** Instantaneous out-of-plane displacement of nine rectangular membranes in array: PMUT membrane length in y direction and expected flow in x direction. The two dummy PMUTs at the ends of the array are not driven electrically. |
|  |
| **Figure 2.** Comparison of membrane instantaneous out-of-plane displacement between numerical simulation and LDV measurement results (for three adjacent PMUT cells inside one periodic pumping section). |

1. **Acoustic streaming theories**

The continuity and Navier-Stokes equation are the governing equations to derive acoustic streaming equations [1]:

(1)

(2)

where is the fluid density, is the acoustic velocity, is the acoustic pressure, and are the bulk and dynamic viscosity of the fluid respectively. By applying the acoustic perturbation theory [34], each of the physical quantities in the acoustic streaming field (such as , , and) can be decomposed into three orders of contribution: the 0th order hydrostatic acoustic field , the 1st order harmonic oscillating acoustic field , and the 2nd order time-averaged acoustic streaming field (). Here, ω is the angular resonant frequency of the 1st order acoustic field and the upper bar represents the time-averaged terms over one period of acoustic wave oscillation. The 1st order governing equations are derived using perturbation theory, together with elimination of higher order terms [1]:

(3)

(4)

By further applying the perturbation expansion to the 2nd order terms and taking a time average over one period of oscillation, the 2nd order governing equations can be written as [1]:

(5)

(6)

where () is the second order time-averaged stationary acoustic streaming velocity. There are two major acoustic contributions that act as the driving force of acoustic streaming: mass source and body force . Their impact on streaming velocity was analyzed in the next section.

1. **FEM simulation**

A mesh convergence study was performed to accurately resolve the acoustic streaming in both the bulk fluid domain and the ultra-thin viscous boundary layer. The acoustic velocity experiences a significant gradient in the viscous boundary layer near the vibrating solid boundaries [2]:

(1)

where is the kinematic viscosity (10-6 m2/s for water), is the thickness of the boundary layer, and the subscript “s” indicates shear. For our study, with an elastic wall vibrating under several MHz range, the viscous boundary layer is in hundreds of nm range, while the acoustic wavelength in the bulk fluid domain is in sub mm range. Therefore, ultra-fine meshing is needed to fully resolve the streaming inside the boundary layer. Based on Equation (2), the scaled thickness of the boundary layer () at a resonance of around 4 MHz is calculated to be 0.35 μm. To capture the velocity gradient near the channel walls, the first mesh layer within the boundary layer was set to 1/8 of , and a stretching factor of 1.2 was applied. To evaluate convergence, the mesh element size in the bulk fluid region () was progressively refined, while the number of the boundary layer () was incrementally increased. The results showed that the second order streaming velocity () stabilized when reduced to 2 μm and increased to 20. At this resolution, the computed was within 0.25% of that obtained with a finer mesh, indicating satisfactory convergence. Overall, a mesh density corresponding to approximately 170 elements per acoustic wavelength was determined to be sufficient for accurate simulation results.

Two acoustic streaming contributions were identified from Equation (5) and (6) in manuscript: mass source and body force respectively. The acoustic wave which propagates inside the bulk fluid domain is induced by the harmonic vibration of the PMUT membrane. The viscous attenuation increases with frequency due to the nonlinear effects. Consequently, a net body force is generated and exerted on the fluid particles to induce streaming flow. The wave attenuation factor can be calculated: [3], where is the angular frequency of the acoustic wave, is the longitudinal viscosity of the fluid, is the density of the fluid, and is the speed of sound in the fluid. The plane wave attenuation of a PMUT-based micropump is 0.395 m-1. Assuming an exponential decay, the acoustic wave amplitude experiences an attenuation less than 1% inside the microfluidic channel, therefore, in our analysis, we neglected the impact of the body force on the acoustic streaming and focus on the analysis of the mass source.

The mass source in the bulk fluid domain was compared for the case of = 0º and 120º to better visualize how the directional acoustic streaming is achieved by applying a phase difference () to adjacent PMUT cells. The mass source is completely symmetric when = 0º (Fig. 3 (a)) with a surface average approaching zero (7.410-5 kg/m3s), resulting in a symmetric and non-directional streaming flow pattern. In comparison, by applying a phase difference of 120º, the symmetry is broken, shown in Fig. 3 (b). The surface averaged mass source is 0.49 kg/m3s, leading to a directional steaming flow. The vortexes and reverse flow are observed close to the PMUT membrane due to its discontinuous vibration nature, also seen from the mass source plots. From the expression of the mass source term: , the divergence operator indicates the divergence and convergence of the acoustic wave particles. The positive mass source indicates the presence of a source, and the negative mass source indicates the presence of a sink. The operation of both sink and source explains the presence of the vortexes and reverse flow close to the PMUT membrane.

|  |
| --- |
|  |
| **Figure 3**. Acoustic streaming mass source and streamlines inside the microfluidic channel. Arrows indicate the direction of the streaming flow. (a) Symmetric mass source and non-directional flow when = 0º. (b) Asymmetric mass source and directional flow when = 120º. |

**Reference**

[1] Hoque, S. Z. Acoustomicrofluidics: the wave equation & the acoustic streaming.

[2] Jørgensen, J. & Bruus, H. Theory of Pressure Acoustics with Thermoviscous Boundary Layers and Streaming in Elastic Cavities. (2020). doi:10.48550/arXiv.2012.07997.

[3] Tiller, B., Reboud, J., Tassieri, M., Wilson, R. & Cooper, J. Frequency dependence of microflows upon acoustic interactions with fluids. Physics of Fluids 29, 122008 (2017).
